# Supplementary material for: Impact of anesthesia methods on perioperative systemic inflammation and long-term outcomes in patients undergoing surgery for hepatocellular carcinoma: a propensity score-matched analysis
Source: PubMed Central journal article supplement — Ann Transl Med. 2021 Jan;9(1):49. doi: 10.21037/atm-20-3704 (PMC7859754; doi:10.21037/atm-20-3704), 2021-01
Supplement: atm-09-01-49-dss.pdf [file atm-09-01-49-dss.pdf]

## Data Sharing Statement

|                     |                                                                                                                                                    |                                                                                                                  |
|---------------------|----------------------------------------------------------------------------------------------------------------------------------------------------|------------------------------------------------------------------------------------------------------------------|
| <b>Article Info</b> | <a href="http://dx.doi.org/10.21037/atm-20-3704">http://dx.doi.org/10.21037/atm-20-3704</a>                                                        |                                                                                                                  |
| <b>Item</b>         | <b>Question</b>                                                                                                                                    | <b>Authors' Response<br/>(place "-" if not applicable)</b>                                                       |
| 1                   | Would you like to share data collected for your study to others?                                                                                   | Yes                                                                                                              |
| 2                   | If not, would you like to share the reason for your decision?                                                                                      |                                                                                                                  |
| 3                   | What data in particular will be shared?                                                                                                            | The survival data in particular will be shared                                                                   |
| 4                   | Any other documents will be share? Such as study protocol, statistical analysis plan, informed consent form, clinical study report, analytic code. | Statistical analysis plan, informed consent form, and clinical study report will also be shared if requested.    |
| 5                   | When will data availability begin?                                                                                                                 | From the publication date.                                                                                       |
| 6                   | When will data availability end?                                                                                                                   | Two years within the publication date, since the technique or survival date may be updated over time.            |
| 7                   | To whom will you share the data?                                                                                                                   | Medical oncologists                                                                                              |
| 8                   | For what type of analysis or purpose?                                                                                                              | For analysis to evaluate anesthesia methods in liver cancer patients.                                            |
| 9                   | How or where can the data/documents be obtained?                                                                                                   | Emails could be sent to the address below to obtain the shared data:<br>eliteromes@126.com                       |
| 10                  | Any other restrictions?                                                                                                                            | We may balance the potential benefits and risks for each request and then provide the data that could be shared. |
