# Supplementary material for: Impact of anesthesia methods on perioperative systemic inflammation and long-term outcomes in patients undergoing surgery for hepatocellular carcinoma: a propensity score-matched analysis
Source: PubMed Central journal article supplement — Ann Transl Med. 2021 Jan;9(1):49. doi: 10.21037/atm-20-3704 (PMC7859754; doi:10.21037/atm-20-3704), 2021-01
Supplement: atm-09-01-49-supplementary.pdf [file atm-09-01-49-supplementary.pdf]

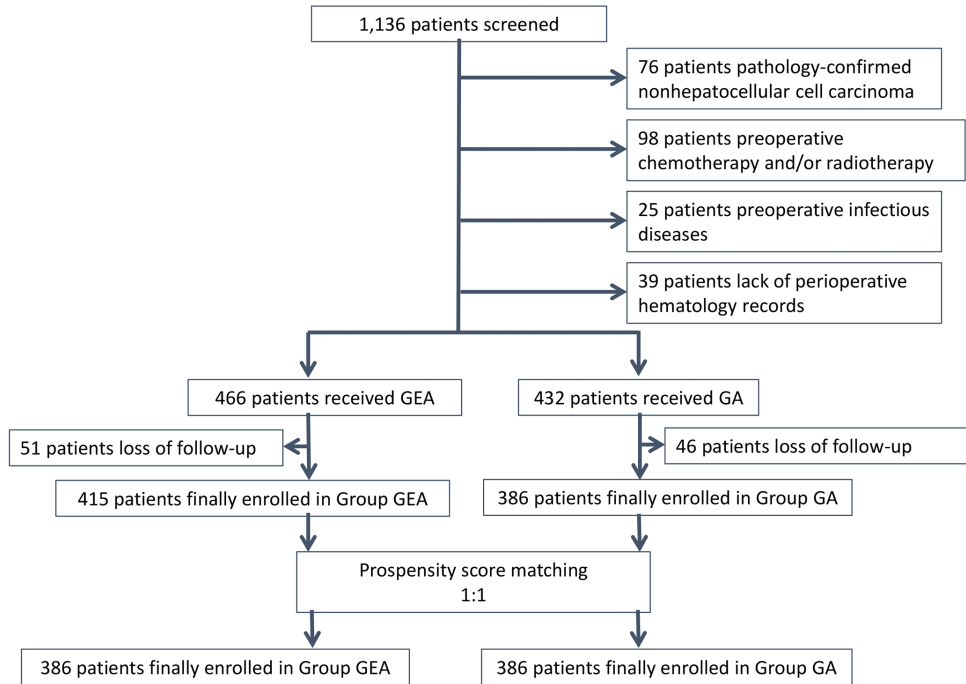

**Figure S1** Flow diagram detailing the selection of patients included in the retrospective analysis. GEA, general anesthesia combined with epidural anesthesia; GA, general anesthesia.
